# Supplementary material for: Response of colonial Peruvian guano birds to flying UAVs: effects and feasibility for implementing new population monitoring methods
Source: PeerJ. 2019 Dec 11;7:e8129. doi: 10.7717/peerj.8129 (PMC6911346; doi:10.7717/peerj.8129)
Supplement: Supplemental Information 1 [file peerj-07-8129-s001.xlsx]

## Sheet: Raw data
Site	Date	Time	variable	Measure	Specie	Condition	Type of reaction
Punta San Juan	2016-08-10	08:30 am - 10:00 am	Altitude	80	GUCO	Non reproductive	NO REACTION
Punta San Juan			Altitude	50	GUCO	Non reproductive	NO REACTION
Punta San Juan			Altitude	30	GUCO	Non reproductive	NO REACTION
Punta San Juan			Altitude	20	GUCO	Non reproductive	NO REACTION
Punta San Juan			Altitude	10	GUCO	Non reproductive	HP
Punta San Juan			Altitude	5	GUCO	Non reproductive	HP
Ballesta Norte	2016-08-14	08:34 am - 08:45 am	Altitude	80	PEBO	Reproductive	NO REACTION
Ballesta Norte			Altitude	50	PEBO	Reproductive	NO REACTION
Ballesta Norte			Altitude	30	PEBO	Reproductive	NO REACTION
Ballesta Norte			Altitude	20	PEBO	Reproductive	NO REACTION
Ballesta Norte			Altitude	10	PEBO	Reproductive	HP
Ballesta Norte			Altitude	5	PEBO	Reproductive	HP WF
Ballesta Norte	2016-08-14	08:52 am - 08:59 am	vertical speed	0.5	PEBO	Reproductive	NO REACTION
Ballesta Norte			vertical speed	1	PEBO	Reproductive	NO REACTION
Ballesta Norte			vertical speed	2	PEBO	Reproductive	NO REACTION
Ballesta Norte			vertical speed	3	PEBO	Reproductive	HP
Ballesta Norte	2016-08-14	09:03 am - 09:15 am	horizontal speed	0 - 3	PEBO	Reproductive	NO REACTION
Ballesta Norte			horizontal speed	3 - 6	PEBO	Reproductive	WF
Ballesta Norte			horizontal speed	6 - 9	PEBO	Reproductive	WF
Ballesta Norte			horizontal speed	9 - 12	PEBO	Reproductive	WF
Ballesta Norte	2016-08-14	11:11 am - 11:26 am	Altitude	80	GUCO	Non reproductive	NO REACTION
Ballesta Norte			Altitude	50	GUCO	Non reproductive	NO REACTION
Ballesta Norte			Altitude	30	GUCO	Non reproductive	HP WR
Ballesta Norte			Altitude	20	GUCO	Non reproductive	NO REACTION
Ballesta Norte			Altitude	10	GUCO	Non reproductive	HP WF
Ballesta Norte			Altitude	5	GUCO	Non reproductive	WR
Ballesta Norte	2016-08-14	11:27 am - 11:35 am	vertical speed	0.5	GUCO	Reproductive	NO REACTION
Ballesta Norte			vertical speed	1	GUCO	Reproductive	NO REACTION
Ballesta Norte			vertical speed	2	GUCO	Reproductive	NO REACTION
Ballesta Norte			vertical speed	3	GUCO	Reproductive	NO REACTION
Ballesta Norte	2016-08-14	11:37 am - 11:50 am	horizontal speed	0 - 3	GUCO	Reproductive	NO REACTION
Ballesta Norte			horizontal speed	3 - 6	GUCO	Reproductive	NO REACTION
Ballesta Norte			horizontal speed	6 - 9	GUCO	Reproductive	WR
Ballesta Norte			horizontal speed	9 - 12	GUCO	Reproductive	NO REACTION
Ballesta Norte	2016-08-15	09:31 am - 09:44 am	Altitude	80	GUCO	Non reproductive	NO REACTION
Ballesta Norte			Altitude	50	GUCO	Non reproductive	NO REACTION
Ballesta Norte			Altitude	30	GUCO	Non reproductive	NO REACTION
Ballesta Norte			Altitude	20	GUCO	Non reproductive	NO REACTION
Ballesta Norte			Altitude	10	GUCO	Non reproductive	WR
Ballesta Norte			Altitude	5	GUCO	Non reproductive	HP WR
Ballesta Norte	2016-08-15	09:45 am - 09:49 am	Altitude	80	GUCO	Non reproductive	NO REACTION
Ballesta Norte			Altitude	50	GUCO	Non reproductive	NO REACTION
Ballesta Norte			Altitude	30	GUCO	Non reproductive	NO REACTION
Ballesta Norte			Altitude	20	GUCO	Non reproductive	WR
Ballesta Norte			Altitude	10	GUCO	Non reproductive	NO REACTION
Ballesta Norte			Altitude	5	GUCO	Non reproductive	WR
Ballesta Norte	2016-08-15	10:51 am - 11:06 am	Altitude	80	GUCO	Reproductive	NO REACTION
Ballesta Norte			Altitude	50	GUCO	Reproductive	NO REACTION
Ballesta Norte			Altitude	30	GUCO	Reproductive	NO REACTION
Ballesta Norte			Altitude	20	GUCO	Reproductive	NO REACTION
Ballesta Norte			Altitude	10	GUCO	Reproductive	HP
Ballesta Norte			Altitude	5	GUCO	Reproductive	HP WF
Lobos de Tierra	2016-08-28	08:21 am - 08:29 am	Altitude	80	GUCO	Non reproductive	NO REACTION
Lobos de Tierra			Altitude	50	GUCO	Non reproductive	NO REACTION
Lobos de Tierra			Altitude	30	GUCO	Non reproductive	NO REACTION
Lobos de Tierra			Altitude	20	GUCO	Non reproductive	NO REACTION
Lobos de Tierra			Altitude	10	GUCO	Non reproductive	NO REACTION
Lobos de Tierra			Altitude	5	GUCO	Non reproductive	HP WF
Lobos de Tierra	2016-08-28	08:30 am - 08:46 am	vertical speed	0.5	GUCO	Non reproductive	NO REACTION
Lobos de Tierra			vertical speed	1	GUCO	Non reproductive	NO REACTION
Lobos de Tierra			vertical speed	2	GUCO	Non reproductive	NO REACTION
Lobos de Tierra			vertical speed	3	GUCO	Non reproductive	NO REACTION
Lobos de Tierra	2016-08-28	08:48 am - 8:57 am	horizontal speed	0 - 3	GUCO	Non reproductive	WR
Lobos de Tierra			horizontal speed	3 - 6	GUCO	Non reproductive	NO REACTION
Lobos de Tierra			horizontal speed	6 - 9	GUCO	Non reproductive	WR
Lobos de Tierra	2016-08-29	06:44 am - 6:59 am	Altitude	80	PEBO	Reproductive	NO REACTION
Lobos de Tierra			Altitude	50	PEBO	Reproductive	NO REACTION
Lobos de Tierra			Altitude	30	PEBO	Reproductive	NO REACTION
Lobos de Tierra			Altitude	20	PEBO	Reproductive	NO REACTION
Lobos de Tierra			Altitude	10	PEBO	Reproductive	NO REACTION
Lobos de Tierra			Altitude	5	PEBO	Reproductive	HP
Lobos de Tierra	2016-08-29	07:00 am - 7:17 am	vertical speed	0.5	PEBO	Reproductive	NO REACTION
Lobos de Tierra			vertical speed	1	PEBO	Reproductive	NO REACTION
Lobos de Tierra			vertical speed	2	PEBO	Reproductive	NO REACTION
Lobos de Tierra			vertical speed	3	PEBO	Reproductive	NO REACTION
Lobos de Tierra	2016-08-29	07:20 am - 7:30 am	horizontal speed	0 - 3	PEBO	Reproductive	NO REACTION
Lobos de Tierra			horizontal speed	3 - 6	PEBO	Reproductive	NO REACTION
Lobos de Tierra			horizontal speed	6 - 9	PEBO	Reproductive	NO REACTION
Lobos de Tierra			horizontal speed	9 - 12	PEBO	Reproductive	NO REACTION
Lobos de Tierra	2016-08-29	08:37 am - 08:43 am	Altitude	80	GUCO	Non reproductive	NO REACTION
Lobos de Tierra			Altitude	50	GUCO	Non reproductive	NO REACTION
Lobos de Tierra			Altitude	30	GUCO	Non reproductive	NO REACTION
Lobos de Tierra			Altitude	20	GUCO	Non reproductive	NO REACTION
Lobos de Tierra			Altitude	10	GUCO	Non reproductive	WF WR
Lobos de Tierra			Altitude	5	GUCO	Non reproductive	WR
Lobos de Tierra	2016-08-29	08:43 am - 08:55 am	vertical speed	0.5	GUCO	Non reproductive	WR
Lobos de Tierra			vertical speed	1	GUCO	Non reproductive	WR
Lobos de Tierra			vertical speed	2	GUCO	Non reproductive	WR
Lobos de Tierra			vertical speed	3	GUCO	Non reproductive	WR
Lobos de Tierra	2016-08-30	03:48 pm - 03:59 pm	Altitude	80	PEPE	Non reproductive	NO REACTION
Lobos de Tierra			Altitude	50	PEPE	Non reproductive	NO REACTION
Lobos de Tierra			Altitude	30	PEPE	Non reproductive	TK
Lobos de Tierra			Altitude	20	PEPE	Non reproductive	TK
Lobos de Tierra			Altitude	10	PEPE	Non reproductive	TK
Lobos de Tierra	2016-08-30	04:00 pm - 04:03 pm	Altitude	80	PEPE	Non reproductive	NO REACTION
Lobos de Tierra			Altitude	50	PEPE	Non reproductive	NO REACTION
Lobos de Tierra			Altitude	30	PEPE	Non reproductive	NO REACTION
Lobos de Tierra			Altitude	20	PEPE	Non reproductive	NO REACTION
Lobos de Tierra			Altitude	10	PEPE	Non reproductive	WR
Lobos de Tierra			Altitude	5	PEPE	Non reproductive	TK
Lobos de Tierra	2016-08-30	04:07 pm - 04:14 pm	vertical speed	0.5	PEPE	Non reproductive	HP
Lobos de Tierra			vertical speed	1	PEPE	Non reproductive	HP
Lobos de Tierra			vertical speed	2	PEPE	Non reproductive	HP
Lobos de Tierra			vertical speed	3	PEPE	Non reproductive	HP
Lobos de Tierra	2016-08-30	04:19 pm - 04:26 pm	vertical speed	0.5	PEPE	Non reproductive	NO REACTION
Lobos de Tierra			vertical speed	1	PEPE	Non reproductive	WR
Lobos de Tierra			vertical speed	2	PEPE	Non reproductive	NO REACTION
Lobos de Tierra			vertical speed	3	PEPE	Non reproductive	NO REACTION
Lobos de Tierra	2016-08-30	04:27 pm - 4:34 pm	horizontal speed	0 - 3	PEPE	Non reproductive	NO REACTION
Lobos de Tierra			horizontal speed	3 - 6	PEPE	Non reproductive	NO REACTION
Lobos de Tierra			horizontal speed	6 - 9	PEPE	Non reproductive	NO REACTION
Lobos de Tierra			horizontal speed	9 - 12	PEPE	Non reproductive	NO REACTION
Lobos de Tierra	2016-08-30	06:45 pm - 6:57 pm	horizontal speed	0 - 3	PEBO	Non reproductive	NO REACTION
Lobos de Tierra			horizontal speed	3 - 6	PEBO	Non reproductive	NO REACTION
Lobos de Tierra			horizontal speed	6 - 9	PEBO	Non reproductive	NO REACTION
Lobos de Tierra			horizontal speed	9 - 12	PEBO	Non reproductive	NO REACTION
Lobos de Tierra			horizontal speed	12 - 15	PEBO	Non reproductive	NO REACTION
Guañape Norte	2016-09-03	12:40 pm - 12:53 pm	Altitude	80	PEPE	Non reproductive	NO REACTION
Guañape Norte			Altitude	50	PEPE	Non reproductive	NO REACTION
Guañape Norte			Altitude	30	PEPE	Non reproductive	NO REACTION
Guañape Norte			Altitude	20	PEPE	Non reproductive	NO REACTION
Guañape Norte			Altitude	10	PEPE	Non reproductive	NO REACTION
Guañape Norte			Altitude	5	PEPE	Non reproductive	TK
Guañape Norte	2016-09-03	12:58 pm - 01:09 pm	vertical speed	0.5	PEPE	Non reproductive	NO REACTION
Guañape Norte			vertical speed	1	PEPE	Non reproductive	NO REACTION
Guañape Norte			vertical speed	2	PEPE	Non reproductive	NO REACTION
Guañape Norte			vertical speed	3	PEPE	Non reproductive	NO REACTION
Guañape Norte	2016-09-04	06:23 am - 6:52 am	Altitude	80	GUCO	Non reproductive	NO REACTION
Guañape Norte			Altitude	50	GUCO	Non reproductive	NO REACTION
Guañape Norte			Altitude	30	GUCO	Non reproductive	NO REACTION
Guañape Norte			Altitude	20	GUCO	Non reproductive	NO REACTION
Guañape Norte			Altitude	10	GUCO	Non reproductive	NO REACTION
Guañape Norte			Altitude	5	GUCO	Non reproductive	WR TK
Guañape Norte	2016-09-04	06:54 am - 7:03 am	horizontal speed	0 - 3	PEPE	Non reproductive	NO REACTION
Guañape Norte			horizontal speed	3 - 6	PEPE	Non reproductive	NO REACTION
Guañape Norte			horizontal speed	6 - 9	PEPE	Non reproductive	NO REACTION
Guañape Norte			horizontal speed	9 - 12	PEPE	Non reproductive	NO REACTION
Guañape Norte	2016-09-04	07:21 am - 7:31 am	horizontal speed	0 - 3	GUCO	Non reproductive	WF WR
Guañape Norte			horizontal speed	3 - 6	GUCO	Non reproductive	NO REACTION
Guañape Norte			horizontal speed	6 - 9	GUCO	Non reproductive	NO REACTION
Guañape Norte			horizontal speed	9 - 12	GUCO	Non reproductive	NO REACTION
Guañape Norte	2016-09-04	07:45 am - 7:51 am	vertical speed	0.5	GUCO	Non reproductive	NO REACTION
Guañape Norte			vertical speed	1	GUCO	Non reproductive	NO REACTION
Guañape Norte			vertical speed	2	GUCO	Non reproductive	NO REACTION
Guañape Norte			vertical speed	3	GUCO	Non reproductive	NO REACTION
Pescadores	2016-09-09	11:33 am - 11:46 am	Altitude	80	GUCO	Reproductive	NO REACTION
Pescadores			Altitude	50	GUCO	Reproductive	NO REACTION
Pescadores			Altitude	30	GUCO	Reproductive	NO REACTION
Pescadores			Altitude	20	GUCO	Reproductive	NO REACTION
Pescadores			Altitude	10	GUCO	Reproductive	NO REACTION
Pescadores			Altitude	5	GUCO	Reproductive	HP
Pescadores	2016-09-09	11:47 am - 11:52 am	vertical speed	0.5	GUCO	Reproductive	NO REACTION
Pescadores			vertical speed	1	GUCO	Reproductive	NO REACTION
Pescadores			vertical speed	2	GUCO	Reproductive	NO REACTION
Pescadores			vertical speed	3	GUCO	Reproductive	NO REACTION
Pescadores	2016-09-09	04:20 pm - 04:33 pm	Altitude	80	PEBO	Non reproductive	NO REACTION
Pescadores			Altitude	50	PEBO	Non reproductive	NO REACTION
Pescadores			Altitude	30	PEBO	Non reproductive	NO REACTION
Pescadores			Altitude	20	PEBO	Non reproductive	NO REACTION
Pescadores			Altitude	10	PEBO	Non reproductive	NO REACTION
Pescadores			Altitude	5	PEBO	Non reproductive	HP
Pescadores	2016-09-09	04:34 pm - 04:39 pm	vertical speed	0.5	PEBO	Non reproductive	NO REACTION
Pescadores			vertical speed	1	PEBO	Non reproductive	NO REACTION
Pescadores			vertical speed	2	PEBO	Non reproductive	NO REACTION
Pescadores			vertical speed	3	PEBO	Non reproductive	NO REACTION
Pescadores	2016-09-09	04:50 pm - 05:02 pm	Altitude	80	GUCO	Non reproductive	NO REACTION
Pescadores			Altitude	50	GUCO	Non reproductive	NO REACTION
Pescadores			Altitude	30	GUCO	Non reproductive	NO REACTION
Pescadores			Altitude	20	GUCO	Non reproductive	NO REACTION
Pescadores			Altitude	10	GUCO	Non reproductive	NO REACTION
Pescadores			Altitude	5	GUCO	Non reproductive	NO REACTION
Pescadores	2016-09-09	05:03 pm - 05:07 pm	vertical speed	0.5	GUCO	Non reproductive	NO REACTION
Pescadores			vertical speed	1	GUCO	Non reproductive	NO REACTION
Pescadores			vertical speed	2	GUCO	Non reproductive	NO REACTION
Pescadores			vertical speed	3	GUCO	Non reproductive	NO REACTION
Pescadores	2016-09-10	7:16 am - 7:19 am	horizontal speed	0 - 3	GUCO	Reproductive	NO REACTION
Pescadores			horizontal speed	3 - 6	GUCO	Reproductive	NO REACTION
Pescadores			horizontal speed	6 - 9	GUCO	Reproductive	NO REACTION
Pescadores			horizontal speed	9 - 12	GUCO	Reproductive	NO REACTION
Asia	2016-10-30	6:57 am - 07:08 am	Altitude	80	GUCO	Non reproductive	NO REACTION
Asia			Altitude	50	GUCO	Non reproductive	NO REACTION
Asia			Altitude	30	GUCO	Non reproductive	NO REACTION
Asia			Altitude	20	GUCO	Non reproductive	NO REACTION
Asia			Altitude	10	GUCO	Non reproductive	HP
Asia			Altitude	5	GUCO	Non reproductive	WF WR
Asia	2016-10-30	7:12 am - 07:40 am	vertical speed	0.5	GUCO	Non reproductive	HP
Asia			vertical speed	1	GUCO	Non reproductive	HP WF
Asia			vertical speed	2	GUCO	Non reproductive	WF WR
Asia			vertical speed	3	GUCO	Non reproductive	WF WR
Asia	2016-10-30	7:41 am - 7:46 am	horizontal speed	0 - 3	GUCO	Non reproductive	NO REACTION
Asia			horizontal speed	3 - 6	GUCO	Non reproductive	HP WF
Asia			horizontal speed	6 - 9	GUCO	Non reproductive	HP WF
Asia			horizontal speed	9-12	GUCO	Non reproductive	WR
Asia	2016-10-30	9:48 am, - 10:03 am	Altitude	80	PEPE	Reproductive	NO REACTION
Asia			Altitude	50	PEPE	Reproductive	NO REACTION
Asia			Altitude	30	PEPE	Reproductive	NO REACTION
Asia			Altitude	20	PEPE	Reproductive	NO REACTION
Asia			Altitude	10	PEPE	Reproductive	NO REACTION
Asia			Altitude	5	PEPE	Reproductive	HP
Asia	2016-10-30	10:15 am - 10:25 am	vertical speed	0.5	PEPE	Reproductive	NO REACTION
Asia			vertical speed	1	PEPE	Reproductive	NO REACTION
Asia			vertical speed	2	PEPE	Reproductive	HP
Asia			vertical speed	3	PEPE	Reproductive	NO REACTION
Asia	2016-10-30	10:32 am - 10:44 am	horizontal speed	0 - 3	PEPE	Reproductive	NO REACTION
Asia			horizontal speed	3 - 6	PEPE	Reproductive	NO REACTION
Asia			horizontal speed	6 - 9	PEPE	Reproductive	NO REACTION
Asia			horizontal speed	9 - 12	PEPE	Reproductive	HP
Asia	2016-10-30	03:51 am - 04:04 om	Altitude	80	PEPE	Reproductive	NO REACTION
Asia			Altitude	50	PEPE	Reproductive	NO REACTION
Asia			Altitude	30	PEPE	Reproductive	NO REACTION
Asia			Altitude	20	PEPE	Reproductive	NO REACTION
Asia			Altitude	10	PEPE	Reproductive	NO REACTION
Asia			Altitude	5	PEPE	Reproductive	HP WF
Asia	2016-10-30	04:06 am - 04:23 am	vertical speed	0.5	PEPE	Reproductive	NO REACTION
Asia			vertical speed	1	PEPE	Reproductive	NO REACTION
Asia			vertical speed	2	PEPE	Reproductive	NO REACTION
Asia			vertical speed	3	PEPE	Reproductive	NO REACTION
Asia	2016-10-30	04:24 pm - 04:31 pm	horizontal speed	0 - 3	PEPE	Reproductive	NO REACTION
Asia			horizontal speed	3 - 6	PEPE	Reproductive	NO REACTION
Asia			horizontal speed	6 - 9	PEPE	Reproductive	NO REACTION
Asia			horizontal speed	9 - 12	PEPE	Reproductive	NO REACTION
Asia	2016-10-31	07:41 am - 07:49 am	Altitude	80	PEPE	Reproductive	NO REACTION
Asia			Altitude	50	PEPE	Reproductive	NO REACTION
Asia			Altitude	30	PEPE	Reproductive	NO REACTION
Asia			Altitude	20	PEPE	Reproductive	NO REACTION
Asia			Altitude	10	PEPE	Reproductive	NO REACTION
Asia			Altitude	5	PEPE	Reproductive	HP
Asia	2016-10-31	07:50 am - 07:58 am	vertical speed	0.5	PEPE	Reproductive	NO REACTION
Asia			vertical speed	1	PEPE	Reproductive	NO REACTION
Asia			vertical speed	2	PEPE	Reproductive	NO REACTION
Asia			vertical speed	3	PEPE	Reproductive	NO REACTION
Punta San Juan	2016-10-30	10:33 am - 10:44 am	Altitude	80	GUCO	Reproductive	NO REACTION
Punta San Juan			Altitude	50	GUCO	Reproductive	NO REACTION
Punta San Juan			Altitude	30	GUCO	Reproductive	NO REACTION
Punta San Juan			Altitude	20	GUCO	Reproductive	NO REACTION
Punta San Juan			Altitude	10	GUCO	Reproductive	NO REACTION
Punta San Juan			Altitude	5	GUCO	Reproductive	NO REACTION
Punta San Juan	2016-10-30	10:45 am - 10:59 am	vertical speed	0.5	GUCO	Reproductive	NO REACTION
Punta San Juan			vertical speed	1	GUCO	Reproductive	NO REACTION
Punta San Juan			vertical speed	2	GUCO	Reproductive	NO REACTION
Punta San Juan			vertical speed	3	GUCO	Reproductive	NO REACTION
Punta San Juan	2016-10-30	11:01 am - 11:08 am	horizontal speed	0 - 3	GUCO	Reproductive	NO REACTION
Punta San Juan			horizontal speed	3 - 6	GUCO	Reproductive	NO REACTION
Punta San Juan			horizontal speed	6 - 9	GUCO	Reproductive	NO REACTION
Punta San Juan			horizontal speed	9 - 12	GUCO	Reproductive	NO REACTION
Punta San Juan	2016-10-31	06:32 am - 06:44 am	Altitude	80	GUCO	Non reproductive	NO REACTION
Punta San Juan			Altitude	50	GUCO	Non reproductive	NO REACTION
Punta San Juan			Altitude	30	GUCO	Non reproductive	NO REACTION
Punta San Juan			Altitude	20	GUCO	Non reproductive	NO REACTION
Punta San Juan			Altitude	10	GUCO	Non reproductive	NO REACTION
Punta San Juan			Altitude	5	GUCO	Non reproductive	HP WR
Punta San Juan	2016-10-31	03:20 pm - 03:32 pm	vertical speed	0.5	GUCO	Non reproductive	NO REACTION
Punta San Juan			vertical speed	1	GUCO	Non reproductive	NO REACTION
Punta San Juan			vertical speed	2	GUCO	Non reproductive	NO REACTION
Punta San Juan			vertical speed	3	GUCO	Non reproductive	NO REACTION
Punta San Juan	2016-10-31	03:40 pm - 03:46 pm	horizontal speed	0 - 3	GUCO	Non reproductive	NO REACTION
Punta San Juan			horizontal speed	3 - 6	GUCO	Non reproductive	NO REACTION
Punta San Juan			horizontal speed	6 - 9	GUCO	Non reproductive	NO REACTION
Punta San Juan			horizontal speed	9 - 12	GUCO	Non reproductive	NO REACTION
Guañape Norte	2016-11-06	08:44 am - 08:55 am	Altitude	80	PEBO	Reproductive	NO REACTION
Guañape Norte			Altitude	50	PEBO	Reproductive	NO REACTION
Guañape Norte			Altitude	30	PEBO	Reproductive	NO REACTION
Guañape Norte			Altitude	20	PEBO	Reproductive	NO REACTION
Guañape Norte			Altitude	10	PEBO	Reproductive	NO REACTION
Guañape Norte			Altitude	5	PEBO	Reproductive	HP TK
Guañape Norte	2016-11-06	09:01 am - 09:11 am	vertical speed	0.5	PEBO	Reproductive	NO REACTION
Guañape Norte			vertical speed	1	PEBO	Reproductive	NO REACTION
Guañape Norte			vertical speed	2	PEBO	Reproductive	NO REACTION
Guañape Norte			vertical speed	3	PEBO	Reproductive	NO REACTION
Guañape Norte	2016-11-06	09:13 am - 09:18 am	horizontal speed	0 - 3	PEBO	Reproductive	NO REACTION
Guañape Norte			horizontal speed	3 - 6	PEBO	Reproductive	NO REACTION
Guañape Norte			horizontal speed	6 - 9	PEBO	Reproductive	HP
Guañape Norte			horizontal speed	9 - 12	PEBO	Reproductive	NO REACTION
Guañape Norte	2016-11-06	10:15 am -10:27 am	Altitude	80	GUCO	Non reproductive	NO REACTION
Guañape Norte			Altitude	50	GUCO	Non reproductive	NO REACTION
Guañape Norte			Altitude	30	GUCO	Non reproductive	NO REACTION
Guañape Norte			Altitude	20	GUCO	Non reproductive	NO REACTION
Guañape Norte			Altitude	10	GUCO	Non reproductive	NO REACTION
Guañape Norte			Altitude	5	GUCO	Non reproductive	HP WR
Guañape Norte	2016-11-06	10:29 am - 1:33 am	vertical speed	0.5	GUCO	Non reproductive	NO REACTION
Guañape Norte			vertical speed	1	GUCO	Non reproductive	NO REACTION
Guañape Norte			vertical speed	2	GUCO	Non reproductive	NO REACTION
Guañape Norte			vertical speed	3	GUCO	Non reproductive	NO REACTION
Guañape Sur	2016-09-04	9:26 am - 9:44 am	Altitude	80	GUCO	Non reproductive	NO REACTION
Guañape Sur			Altitude	50	GUCO	Non reproductive	NO REACTION
Guañape Sur			Altitude	30	GUCO	Non reproductive	NO REACTION
Guañape Sur			Altitude	20	GUCO	Non reproductive	NO REACTION
Guañape Sur			Altitude	10	GUCO	Non reproductive	HP WR
Guañape Sur			Altitude	5	GUCO	Non reproductive	HP WF
Pescadores	2016-11-09	11:30 am - 11:41 am	Altitude	80	PEPE	Reproductive	NO REACTION
Pescadores			Altitude	50	PEPE	Reproductive	NO REACTION
Pescadores			Altitude	30	PEPE	Reproductive	NO REACTION
Pescadores			Altitude	20	PEPE	Reproductive	NO REACTION
Pescadores			Altitude	10	PEPE	Reproductive	NO REACTION
Pescadores			Altitude	5	PEPE	Reproductive	HP
Pescadores	2016-11-09	11:50 am - 11:57 am	vertical speed	0.5	PEPE	Reproductive	NO REACTION
Pescadores			vertical speed	1	PEPE	Reproductive	NO REACTION
Pescadores			vertical speed	2	PEPE	Reproductive	NO REACTION
Pescadores			vertical speed	3	PEPE	Reproductive	NO REACTION
Pescadores	2016-11-09	03:15 pm - 03:19 pm	horizontal speed	0 - 3	PEPE	Reproductive	NO REACTION
Pescadores			horizontal speed	3 - 6	PEPE	Reproductive	NO REACTION
Pescadores			horizontal speed	6 - 9	PEPE	Reproductive	NO REACTION
Pescadores			horizontal speed	9 - 12	PEPE	Reproductive	HP
Pescadores	2016-11-09	10:52 am - 11:04 am	Altitude	80	GUCO	Reproductive	NO REACTION
Pescadores			Altitude	50	GUCO	Reproductive	NO REACTION
Pescadores			Altitude	30	GUCO	Reproductive	NO REACTION
Pescadores			Altitude	20	GUCO	Reproductive	NO REACTION
Pescadores			Altitude	10	GUCO	Reproductive	NO REACTION
Pescadores			Altitude	5	GUCO	Reproductive	HP
Pescadores	2016-11-09	11:10 am - 11:18 am	vertical speed	0.5	GUCO	Reproductive	NO REACTION
Pescadores			vertical speed	1	GUCO	Reproductive	NO REACTION
Pescadores			vertical speed	2	GUCO	Reproductive	NO REACTION
Pescadores			vertical speed	3	GUCO	Reproductive	NO REACTION
Pescadores	2016-11-09	11:19 am - 11:23 am	horizontal speed	0 - 3	GUCO	Reproductive	NO REACTION
Pescadores			horizontal speed	3 - 6	GUCO	Reproductive	NO REACTION
Pescadores			horizontal speed	6 - 9	GUCO	Reproductive	NO REACTION
Pescadores			horizontal speed	9 - 12	GUCO	Reproductive	NO REACTION
Pescadores	2016-11-09	03:38 pm - 03:52 pm	Altitude	80	PEBO	Non reproductive	NO REACTION
Pescadores			Altitude	50	PEBO	Non reproductive	NO REACTION
Pescadores			Altitude	30	PEBO	Non reproductive	NO REACTION
Pescadores			Altitude	20	PEBO	Non reproductive	NO REACTION
Pescadores			Altitude	10	PEBO	Non reproductive	NO REACTION
Pescadores			Altitude	5	PEBO	Non reproductive	HP
Pescadores	2016-11-09	04:02 pm - 04:14 pm	vertical speed	0.5	PEBO	Reproductive	NO REACTION
Pescadores			vertical speed	1	PEBO	Reproductive	NO REACTION
Pescadores			vertical speed	2	PEBO	Reproductive	NO REACTION
Pescadores			vertical speed	3	PEBO	Reproductive	NO REACTION
Chicha Centro	2016-12-12	10:58 am - 11:11am	Altitude	80	PEBO	Reproductive	NO REACTION
Chicha Centro			Altitude	50	PEBO	Reproductive	NO REACTION
Chicha Centro			Altitude	30	PEBO	Reproductive	NO REACTION
Chicha Centro			Altitude	20	PEBO	Reproductive	NO REACTION
Chicha Centro			Altitude	10	PEBO	Reproductive	HP WF
Chicha Centro			Altitude	5	PEBO	Reproductive	WF
Chicha Centro	2016-12-12	11:12 am - 11:25 am	vertical speed	0.5	PEBO	Reproductive	NO REACTION
Chicha Centro			vertical speed	1	PEBO	Reproductive	NO REACTION
Chicha Centro			vertical speed	2	PEBO	Reproductive	NO REACTION
Chicha Centro			vertical speed	3	PEBO	Reproductive	NO REACTION
Chicha Centro	2016-12-12	11:57 am - 12:02 pm	horizontal speed	0 - 3	PEBO	Reproductive	NO REACTION
Chicha Centro			horizontal speed	3 - 6	PEBO	Reproductive	NO REACTION
Chicha Centro			horizontal speed	6 - 9	PEBO	Reproductive	HP
Chicha Centro			horizontal speed	9 - 12	PEBO	Reproductive	NO REACTION
Chicha Centro	2016-12-13	06:56 am - 07:05 am	Altitude	80	PEBO	Non reproductive	NO REACTION
Chicha Centro			Altitude	50	PEBO	Non reproductive	NO REACTION
Chicha Centro			Altitude	30	PEBO	Non reproductive	NO REACTION
Chicha Centro			Altitude	20	PEBO	Non reproductive	HP
Chicha Centro			Altitude	10	PEBO	Non reproductive	HP
Chicha Centro			Altitude	5	PEBO	Non reproductive	TK
Chicha Centro	2016-12-13	07:14 am - 07: 20 am	vertical speed	0.5	PEBO	Non reproductive	NO REACTION
Chicha Centro			vertical speed	1	PEBO	Non reproductive	NO REACTION
Chicha Centro			vertical speed	2	PEBO	Non reproductive	NO REACTION
Chicha Centro			vertical speed	3	PEBO	Non reproductive	NO REACTION
Chincha Sur	2016-12-13	09:59 am - 10:09 am	Altitude	80	PEBO	Non reproductive	NO REACTION
Chincha Sur			Altitude	50	PEBO	Non reproductive	NO REACTION
Chincha Sur			Altitude	30	PEBO	Non reproductive	NO REACTION
Chincha Sur			Altitude	20	PEBO	Non reproductive	HP
Chincha Sur			Altitude	10	PEBO	Non reproductive	HP TK
Chincha Sur			Altitude	5	PEBO	Non reproductive	HP TK
Chincha Sur	2016-12-13	10:10 am - 10:20 am	vertical speed	0.5	PEBO	Non reproductive	HP
Chincha Sur			vertical speed	1	PEBO	Non reproductive	HP
Chincha Sur			vertical speed	2	PEBO	Non reproductive	NO REACTION
Chincha Sur			vertical speed	3	PEBO	Non reproductive	NO REACTION
Chincha Sur	2016-12-13	10:27 am - 10:52 am	horizontal speed	0 - 3	PEBO	Non reproductive	NO REACTION
Chincha Sur			horizontal speed	3 - 6	PEBO	Non reproductive	NO REACTION
Chincha Sur			horizontal speed	6 - 9	PEBO	Non reproductive	NO REACTION
Chincha Sur			horizontal speed	9 - 12	PEBO	Non reproductive	NO REACTION
Chincha Sur	2016-12-13	12:28 pm - 12:42 pm	Altitude	80	PEBO	Non reproductive	NO REACTION
Chincha Sur			Altitude	50	PEBO	Non reproductive	NO REACTION
Chincha Sur			Altitude	30	PEBO	Non reproductive	NO REACTION
Chincha Sur			Altitude	20	PEBO	Non reproductive	NO REACTION
Chincha Sur			Altitude	10	PEBO	Non reproductive	HP
Chincha Sur			Altitude	5	PEBO	Non reproductive	HP WF
Mazorca	2016-12-15	08:48 am - 08:53 am	Altitude	80	PEBO	Non reproductive	NO REACTION
Mazorca			Altitude	50	PEBO	Non reproductive	NO REACTION
Mazorca			Altitude	30	PEBO	Non reproductive	NO REACTION
Mazorca			Altitude	20	PEBO	Non reproductive	TK
Mazorca			Altitude	10	PEBO	Non reproductive	HP
Mazorca			Altitude	5	PEBO	Non reproductive	HP TK
Mazorca	2016-12-15	08:45 am - 09:02 am	vertical speed	0.5	PEBO	Non reproductive	HP TK
Mazorca			vertical speed	1	PEBO	Non reproductive	TK
Mazorca			vertical speed	2	PEBO	Non reproductive	HP WF 20m
Mazorca			vertical speed	3	PEBO	Non reproductive	HP
Mazorca	2016-12-15	11:28 am - 11:35 am	Altitude	80	PEBO	Non reproductive	NO REACTION
Mazorca			Altitude	50	PEBO	Non reproductive	NO REACTION
Mazorca			Altitude	30	PEBO	Non reproductive	NO REACTION
Mazorca			Altitude	20	PEBO	Non reproductive	NO REACTION
Mazorca			Altitude	10	PEBO	Non reproductive	HP
Mazorca			Altitude	5	PEBO	Non reproductive	HP TK
Mazorca	2016-12-15	11:37 am - 11:45 am	vertical speed	0.5	PEBO	Non reproductive	NO REACTION
Mazorca			vertical speed	1	PEBO	Non reproductive	HP
Mazorca			vertical speed	2	PEBO	Non reproductive	HP
Mazorca			vertical speed	3	PEBO	Non reproductive	HP
Guañape Norte			Altitude	80	PEBO	Non reproductive	NO REACTION
Guañape Norte			Altitude	50	PEBO	Non reproductive	NO REACTION
Guañape Norte			Altitude	30	PEBO	Non reproductive	NO REACTION
Guañape Norte			Altitude	20	PEBO	Non reproductive	NO REACTION
Guañape Norte			Altitude	10	PEBO	Non reproductive	HP
Guañape Norte			Altitude	5	PEBO	Non reproductive	HP WF
Guañape Norte			vertical speed	0.5	PEBO	Non reproductive	NO REACTION
Guañape Norte			vertical speed	1	PEBO	Non reproductive	HP
Guañape Norte			vertical speed	2	PEBO	Non reproductive	HP WF
Guañape Norte			vertical speed	3	PEBO	Non reproductive	HP WF
Guañape Norte			Altitude	80	PEBO	Reproductive	NO REACTION
Guañape Norte			Altitude	50	PEBO	Reproductive	NO REACTION
Guañape Norte			Altitude	30	PEBO	Reproductive	NO REACTION
Guañape Norte			Altitude	20	PEBO	Reproductive	NO REACTION
Guañape Norte			Altitude	10	PEBO	Reproductive	NO REACTION
Guañape Norte			Altitude	5	PEBO	Reproductive	HP
Guañape Norte			vertical speed	0.5	PEBO	Reproductive	HP
Guañape Norte			vertical speed	1	PEBO	Reproductive	HP
Guañape Norte			vertical speed	2	PEBO	Reproductive	HP
Guañape Norte			vertical speed	3	PEBO	Reproductive	HP
Chincha Sur			Altitude	80	PEBO	Reproductive	NO REACTION
Chincha Sur			Altitude	50	PEBO	Reproductive	NO REACTION
Chincha Sur			Altitude	30	PEBO	Reproductive	NO REACTION
Chincha Sur			Altitude	20	PEBO	Reproductive	NO REACTION
Chincha Sur			Altitude	10	PEBO	Reproductive	NO REACTION
Chincha Sur			Altitude	5	PEBO	Reproductive	HP
Chincha Sur			vertical speed	0.5	PEBO	Reproductive	NO REACTION
Chincha Sur			vertical speed	1	PEBO	Reproductive	NO REACTION
Chincha Sur			vertical speed	2	PEBO	Reproductive	HP
Chincha Sur			vertical speed	3	PEBO	Reproductive	HP
Chincha Sur			Altitude	80	PEBO	Non reproductive	NO REACTION
Chincha Sur			Altitude	50	PEBO	Non reproductive	NO REACTION
Chincha Sur			Altitude	30	PEBO	Non reproductive	NO REACTION
Chincha Sur			Altitude	20	PEBO	Non reproductive	NO REACTION
Chincha Sur			Altitude	10	PEBO	Non reproductive	NO REACTION
Chincha Sur			Altitude	5	PEBO	Non reproductive	WR TK
Chincha Sur			vertical speed	0.5	PEBO	Non reproductive	NO REACTION
Chincha Sur			vertical speed	1	PEBO	Non reproductive	NO REACTION
Chincha Sur			vertical speed	2	PEBO	Non reproductive	NO REACTION
Chincha Sur			vertical speed	3	PEBO	Non reproductive	HP
Chincha Sur			horizontal speed	3 - 6	PEBO	Non reproductive	NO REACTION
Chincha Sur			horizontal speed	6 - 9	PEBO	Non reproductive	NO REACTION
Chincha Sur			horizontal speed	9 - 12	PEBO	Non reproductive	NO REACTION
Chincha Sur			horizontal speed	12 - 15	PEBO	Non reproductive	NO REACTION
Chincha Sur			horizontal speed	3 - 6	PEBO	Reproductive	NO REACTION
Chincha Sur			horizontal speed	6 - 9	PEBO	Reproductive	NO REACTION
Chincha Sur			horizontal speed	9 - 12	PEBO	Reproductive	NO REACTION
Chincha Sur			horizontal speed	12 - 15	PEBO	Reproductive	NO REACTION
Mazorca	2017-02-09	06:23 am - 06:31 am	Altitude	80	PEBO	Non reproductive	NO REACTION
Mazorca			Altitude	50	PEBO	Non reproductive	NO REACTION
Mazorca			Altitude	30	PEBO	Non reproductive	NO REACTION
Mazorca			Altitude	20	PEBO	Non reproductive	NO REACTION
Mazorca			Altitude	10	PEBO	Non reproductive	HP
Mazorca			Altitude	5	PEBO	Non reproductive	HP WF
Mazorca	2017-02-09	06:32 pm - 06:48 pm	vertical speed	0.5	PEBO	Non reproductive	HP
Mazorca			vertical speed	1	PEBO	Non reproductive	HP
Mazorca			vertical speed	2	PEBO	Non reproductive	HP WF
Mazorca			vertical speed	3	PEBO	Non reproductive	HP WF
Mazorca	2017-02-09	08:46 am - 08:54 am	Altitude	80	PEBO	Reproductive	NO REACTION
Mazorca			Altitude	50	PEBO	Reproductive	NO REACTION
Mazorca			Altitude	30	PEBO	Reproductive	NO REACTION
Mazorca			Altitude	20	PEBO	Reproductive	NO REACTION
Mazorca			Altitude	10	PEBO	Reproductive	NO REACTION
Mazorca			Altitude	5	PEBO	Reproductive	HP
Mazorca	2017-02-09	08:56 am - 09:03 am	vertical speed	0.5	PEBO	Reproductive	HP
Mazorca			vertical speed	1	PEBO	Reproductive	NO REACTION
Mazorca			vertical speed	2	PEBO	Reproductive	HP
Mazorca			vertical speed	3	PEBO	Reproductive	HP
Mazorca	2017-02-10	07:23 am - 07:32 am	Altitude	80	PEBO	Reproductive	NO REACTION
Mazorca			Altitude	50	PEBO	Reproductive	HP
Mazorca			Altitude	30	PEBO	Reproductive	NO REACTION
Mazorca			Altitude	20	PEBO	Reproductive	NO REACTION
Mazorca			Altitude	10	PEBO	Reproductive	HP
Mazorca			Altitude	5	PEBO	Reproductive	WF
Mazorca	2017-02-10	07:32 am - 07:48 am	vertical speed	0.5	PEBO	Reproductive	WF 20m
Mazorca			vertical speed	1	PEBO	Reproductive	HP WF
Mazorca			vertical speed	2	PEBO	Reproductive	NO REACTION
Mazorca			vertical speed	3	PEBO	Reproductive	WF TK 10m
Mazorca	2017-02-10	07:53 am - 08:03 am	Altitude	80	PEBO	Reproductive	NO REACTION
Mazorca			Altitude	50	PEBO	Reproductive	NO REACTION
Mazorca			Altitude	30	PEBO	Reproductive	NO REACTION
Mazorca			Altitude	20	PEBO	Reproductive	NO REACTION
Mazorca			Altitude	10	PEBO	Reproductive	HP
Mazorca			Altitude	5	PEBO	Reproductive	HP
Mazorca	2017-02-10	08:07 am - 08:20 am	vertical speed	0.5	PEBO	Reproductive	NO REACTION
Mazorca			vertical speed	1	PEBO	Reproductive	NO REACTION
Mazorca			vertical speed	2	PEBO	Reproductive	NO REACTION
Mazorca			vertical speed	3	PEBO	Reproductive	NO REACTION
Macabí			Altitude	80	PEBO	Non reproductive	NO REACTION
Macabí			Altitude	50	PEBO	Non reproductive	NO REACTION
Macabí			Altitude	30	PEBO	Non reproductive	NO REACTION
Macabí			Altitude	20	PEBO	Non reproductive	NO REACTION
Macabí			Altitude	10	PEBO	Non reproductive	NO REACTION
Macabí			Altitude	5	PEBO	Non reproductive	HP
Macabí			vertical speed	0.5	PEBO	Non reproductive	NO REACTION
Macabí			vertical speed	1	PEBO	Non reproductive	NO REACTION
Macabí			vertical speed	2	PEBO	Non reproductive	NO REACTION
Macabí			vertical speed	3	PEBO	Non reproductive	NO REACTION
Macabí			horizontal speed	0 - 3	PEBO	Non reproductive	NO REACTION
Macabí			horizontal speed	3 - 6	PEBO	Non reproductive	NO REACTION
Macabí			horizontal speed	6 - 9	PEBO	Non reproductive	NO REACTION
Macabí			horizontal speed	9 - 12	PEBO	Non reproductive	NO REACTION
Macabí			Altitude	80	GUCO	Non reproductive	NO REACTION
Macabí			Altitude	50	GUCO	Non reproductive	NO REACTION
Macabí			Altitude	30	GUCO	Non reproductive	NO REACTION
Macabí			Altitude	20	GUCO	Non reproductive	NO REACTION
Macabí			Altitude	10	GUCO	Non reproductive	NO REACTION
Macabí			Altitude	5	GUCO	Non reproductive	WR
Macabí			vertical speed	0.5	GUCO	Non reproductive	WR
Macabí			vertical speed	1	GUCO	Non reproductive	NO REACTION
Macabí			vertical speed	2	GUCO	Non reproductive	WF WR
Macabí			vertical speed	3	GUCO	Non reproductive	NO REACTION
Macabí			horizontal speed	0 - 3	GUCO	Non reproductive	NO REACTION
Macabí			horizontal speed	3 - 6	GUCO	Non reproductive	NO REACTION
Macabí			horizontal speed	6 - 9	GUCO	Non reproductive	NO REACTION
Macabí			horizontal speed	9 - 12	GUCO	Non reproductive	NO REACTION
